# Supplementary material for: The NIH BRAIN Initiative’s impacts in systems and computational neuroscience and team-scale research 2014–2023
Source: eLife journal article supplement (doi:10.7554/elife.106136), 2025-04-01
Supplement: supp2 [file elife-106136-supp2-v1.pdf]

**A**

| Title                                                                                       | T or M or M | GitHub Stars |
|---------------------------------------------------------------------------------------------|-------------|--------------|
| Next-Generation Calcium Imaging Analysis Methods                                            | Method      | 1648         |
| Human Neocortical Neurosolver                                                               | Model       | 474          |
| Embedded Ensemble Encoding                                                                  | Theory      | 256          |
| Uncovering Population-Level Cellular Relationships to Behavior via Mesoscale Networks       | Model       | 58           |
| Data-driven analysis for neuronal dynamic modeling                                          | Method      | 56           |
| Methods from Computational Topology and Geometry for Analyzing Neuronal Tree and Graph Data | Method      | 55           |
| Measuring, Modeling, and Modulating Cross-Frequency Coupling                                | Model       | 52           |
| Modeling the structure-function relation in a reconstructed cortical tissue                 | Model       | 46           |
| Real-time statistical algorithms for controlling neural dynamics and behavior               | Method      | 33           |

**B**

| Repository                                                                                                          | Purpose                                                                 | Stars | Watchers |
|---------------------------------------------------------------------------------------------------------------------|-------------------------------------------------------------------------|-------|----------|
| <a href="https://github.com/flaticoninstitute/CalmAn">https://github.com/flaticoninstitute/CalmAn</a>               | Computational toolbox for large-scale Ca <sup>2+</sup> imaging analysis | 540   | 50       |
| <a href="https://github.com/flaticoninstitute/CalmAn-MATLAB">https://github.com/flaticoninstitute/CalmAn-MATLAB</a> | Matlab pipeline for large scale Calcium imaging analysis                | 236   | 60       |
| <a href="https://github.com/zhoupc/CNMF_E">https://github.com/zhoupc/CNMF_E</a>                                     | Constrained Non-negative Matrix Factorization for MicroEndoscopic data  | 128   | 53       |
