# Supplementary material for: The NIH BRAIN Initiative’s impacts in systems and computational neuroscience and team-scale research 2014–2023
Source: eLife journal article supplement (doi:10.7554/elife.106136), 2025-04-01
Supplement: supp3 [file elife-106136-supp3-v1.pdf]

| PMID                 | Manuscript Title                                                                                                                       | Altmetric |
|----------------------|----------------------------------------------------------------------------------------------------------------------------------------|-----------|
| <b>TargetBCP R01</b> |                                                                                                                                        |           |
| 31473062             | A Rare Mutation of $\beta$ 1-Adrenergic Receptor Affects Sleep/Wake Behaviors.                                                         | 1380      |
| 37425937             | Neuronal wiring diagram of an adult brain.                                                                                             | 1072      |
| 36007021             | A cognitive process occurring during sleep is revealed by rapid eye movements.                                                         | 1029      |
| 32939091             | Deep posteromedial cortical rhythm in dissociation.                                                                                    | 801       |
| 31619542             | Mutant neuropeptide S receptor reduces sleep duration with preserved memory consolidation.                                             | 775       |
| 31150625             | Human Gut Microbiota from Autism Spectrum Disorder Promote Behavioral Symptoms in Mice.*                                               | 775       |
| 33057202             | PIEZO2 in sensory neurons and urothelial cells coordinates urination.                                                                  | 695       |
| 31642810             | An Integrated Brain-Machine Interface Platform With Thousands of Channels.                                                             | 628       |
| 38092914             | A transcriptomic taxonomy of mouse brain-wide spinal projecting neurons.                                                               | 600       |
| <b>TeamBCP U19</b>   |                                                                                                                                        |           |
| 32937591             | Non-neuronal expression of SARS-CoV-2 entry genes in the olfactory system suggests mechanisms underlying COVID-19-associated anosmia.* | 2777      |
| 36603070             | A mesothelium divides the subarachnoid space into functional compartments.                                                             | 2215      |
| 37730989             | Neural circuitry for maternal oxytocin release induced by infant cries.                                                                | 2095      |
| 35381183             | The perception of odor pleasantness is shared across cultures.                                                                         | 1419      |
| 28445462             | Cell diversity and network dynamics in photosensitive human brain organoids.*                                                          | 891       |
| 34381215             | Oxytocin neurons enable social transmission of maternal behavior.                                                                      | 824       |
| 32554567             | Manipulating synthetic optogenetic odors reveals the coding logic of olfactory perception                                              | 784       |
| 37286598             | Antagonistic circuits mediating infanticide and maternal care in female mice.                                                          | 723       |
| 34930847             | De novo mutations in childhood cases of sudden unexplained death that disrupt intracellular Ca <sup>2+</sup> regulation.*              | 721       |
| 36889318             | Mouse spontaneous behavior reflects individual variation rather than estrous state.                                                    | 694       |
| 36572698             | Multimodal monitoring of human cortical organoids implanted in mice reveal functional connection with visual cortex.*                  | 654       |
| 34381214             | A metabolic function of the hippocampal sharp wave-ripple                                                                              | 612       |
| <b>ROH U01</b>       |                                                                                                                                        |           |
| 31019317             | Speech synthesis from neural decoding of spoken sentences.                                                                             | 3065      |
| 34260835             | Neuroprosthesis for Decoding Speech in a Paralyzed Person with Anarthria.                                                              | 2705      |
| 32231340             | Machine translation of cortical activity to text with an encoder-decoder framework.                                                    | 1357      |
| 32375031             | Replay of Learned Neural Firing Sequences during Rest in Human Motor Cortex.                                                           | 772       |
| 33462446             | State-dependent responses to intracranial brain stimulation in a patient with depression.*                                             | 645       |

|                |                                                                                           |     |
|----------------|-------------------------------------------------------------------------------------------|-----|
| 35511978       | The geometry of domain-general performance monitoring in the human medial frontal cortex. | 614 |
| 29779940       | Encoding of Articulatory Kinematic Trajectories in Human Speech Sensorimotor Cortex.      | 609 |
| <b>TMM R01</b> |                                                                                           |     |
| 29397273       | Anxiety Cells in a Hippocampal-Hypothalamic Circuit.                                      | 943 |
